# Supplementary material
Source: PubMed Central journal article supplement (PMC7554178)
Supplement: NIHMS1609149-supplement-2.pdf [file NIHMS1609149-supplement-2.pdf]

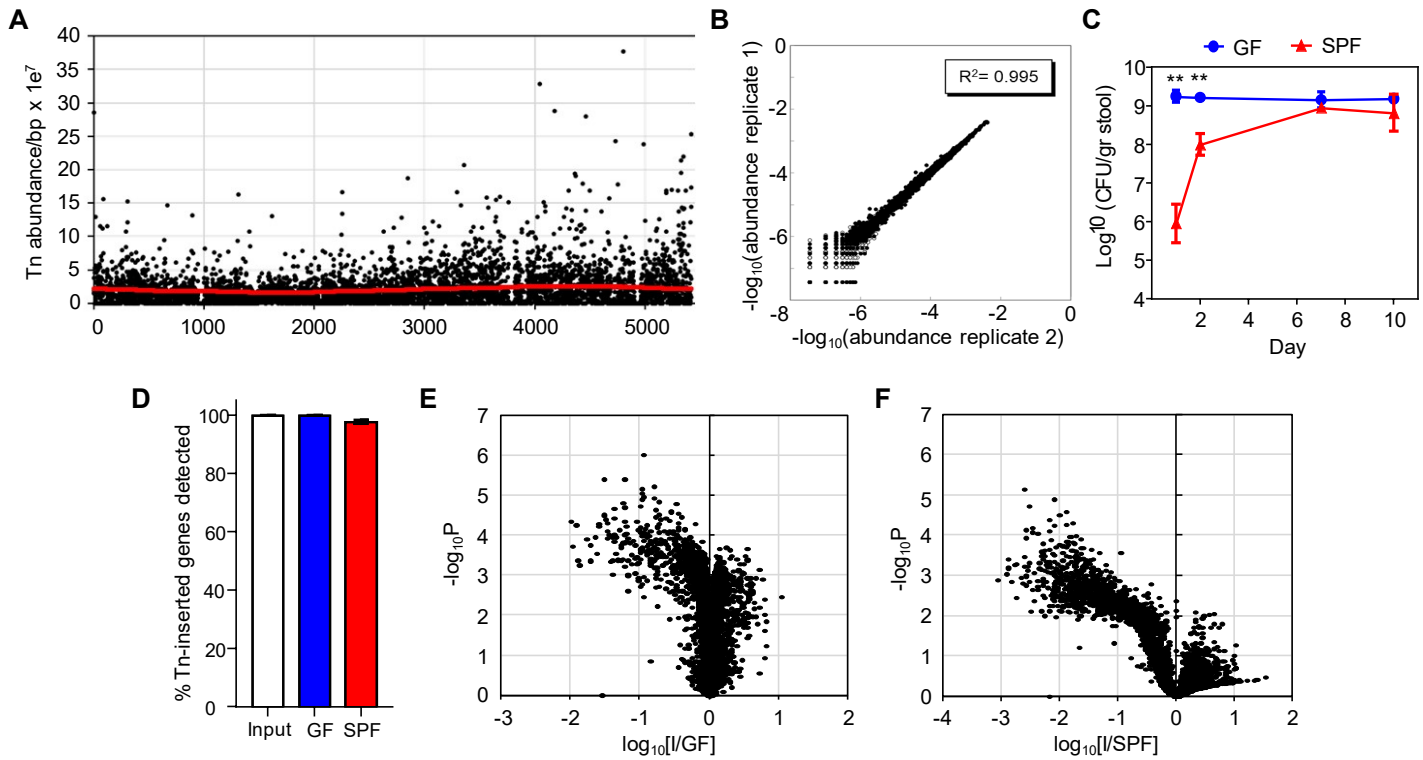

**Figure. S1 Characterization of the *C. rodentium* mutant library *in vitro* and after infection in SPF and GF mice (related to Figure 1).** (A) Genome-wide distribution and frequency of mutations in the library. Individual Tn densities per gene (dots) are shown. Red line, 3,000 gene moving average. (B) Correlation plot of relative Tn abundance per gene from two individual library replicates grown *in vitro*.  $R^2$ , coefficient of determination. (C) Total pathogen loads in feces of GF and SPF mice orally inoculated with the mutant library (input). (D) Percentage of mutated (Tn-inserted) genes detected by Illumina sequencing before (input) and two days after inoculation (outputs) in GF and SPF mice. Input=100%. (E-F) Volcano plots showing relative mutant abundances (Tn density ratios) and p-values (P) for individual genes two days post-infection in GF (E) and SPF mice (F) compared to the input. Data are means  $\pm$  SD (C-D). \*\*, p, 0.01 by Mann-Whitney U test (C).

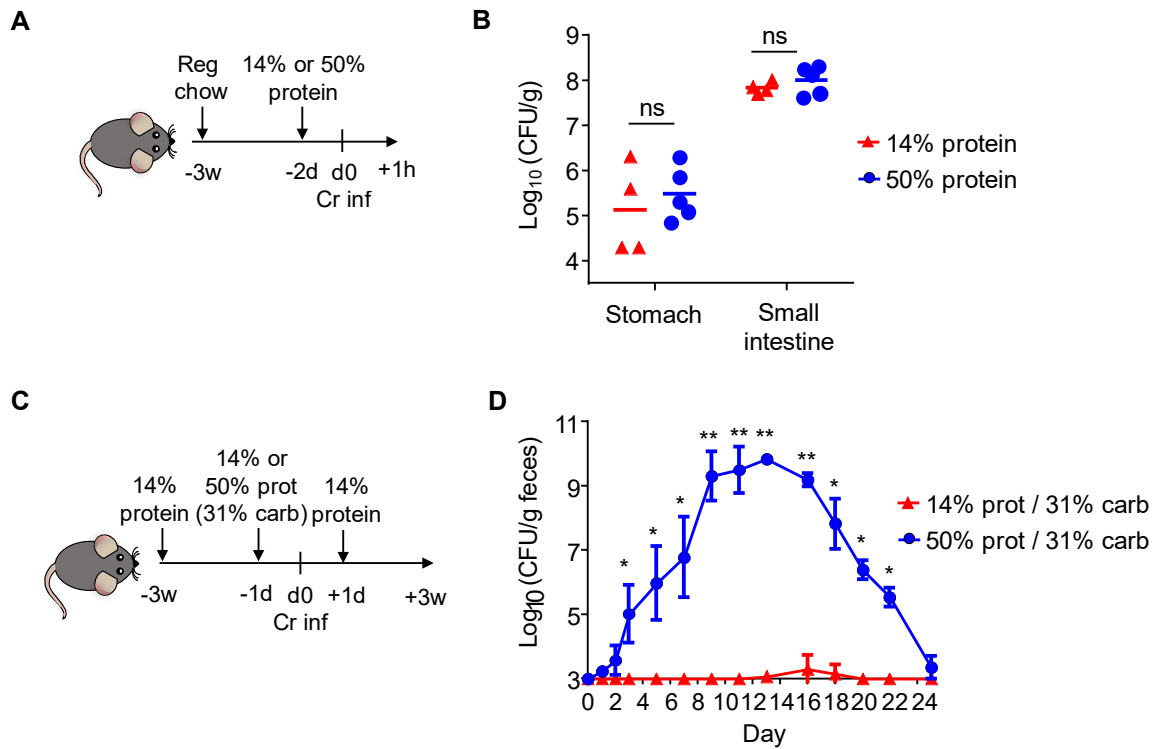

**Figure S2. Increased pathogen colonization is not due to a buffering effect in the stomach or lower carbohydrate content in the 50% protein diet (related to Figure 4).** (A) Mice were weaned on regular chow and then exposed to 14% or 50% protein diet for two days before oral inoculation with *C. rodentium*. Mice were euthanized 1 h after infection and pathogen loads were determined both in the tissue and luminal contents of stomach and small intestine. (B) *C. rodentium* loads in stomach and small intestine in mice treated as in (A). (C) Mice were weaned on 14% protein diet and then exposed to carbohydrate-normalized 14% or 50% protein diets one day before and after inoculation with  $10^5$  cfu of *C. rodentium*. (D) Pathogen loads in feces of mice treated as in (C). Representative results of two independent experiments with  $n=4-5$  per group are shown (B and D). Each symbol represents one mouse (B). \*,  $p<0.05$ ; \*\*,  $p<0.01$ ; ns, not significant by Mann-Whitney U test.

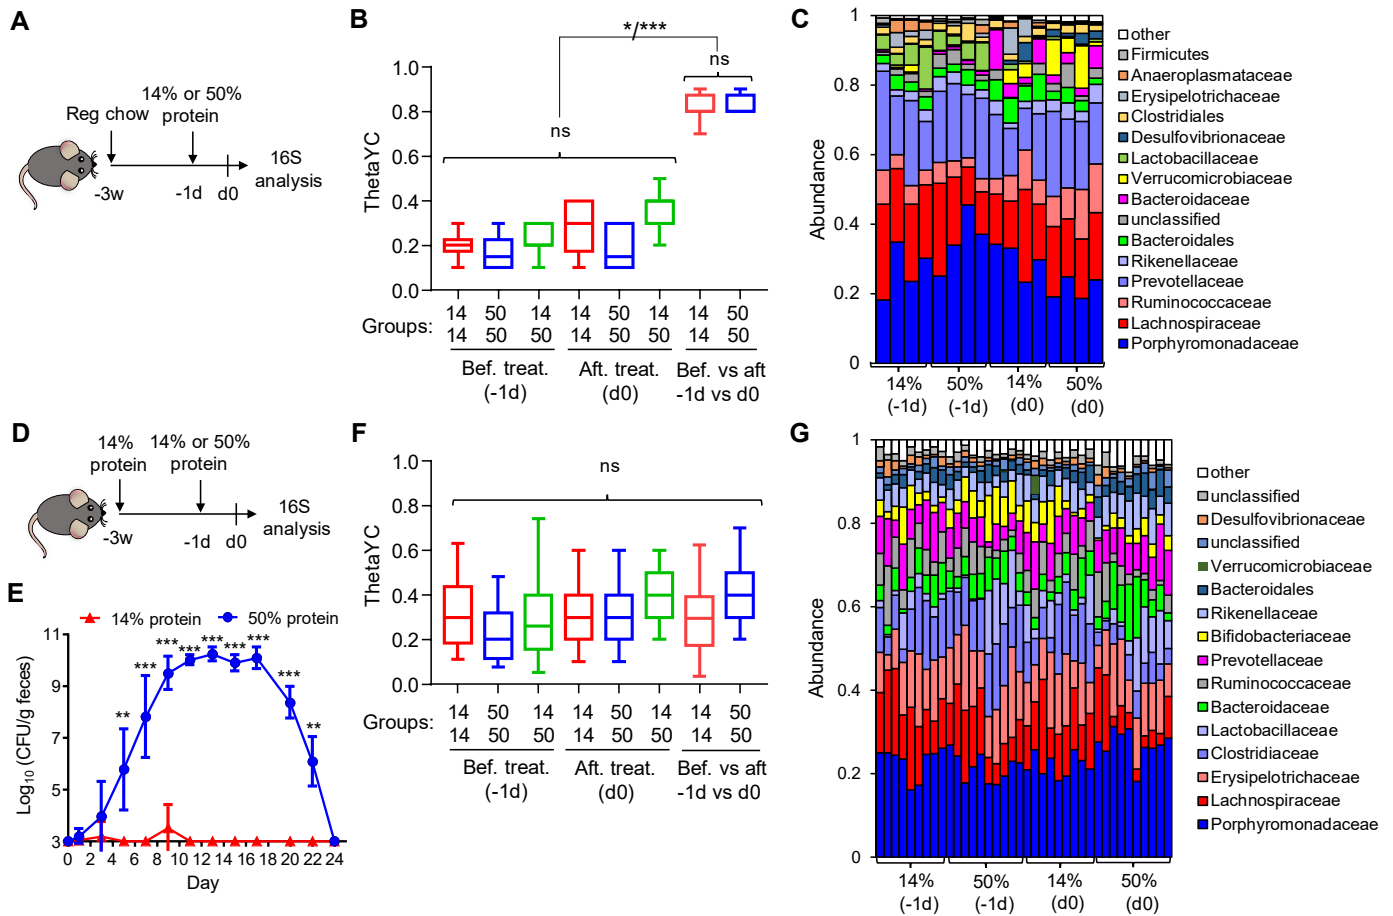

**Figure S3. Analyses of fecal microbiota after short-term treatment with protein diets (related to Figure 4).** (A-G) SPF mice were weaned and maintained for 3 weeks on regular chow (A-C) or 14 % protein diet (D-G), and then treated for one day with the indicated diets (A and D). Composition of the fecal microbiota was determined by 16S rDNA sequencing one day before and after treatment. (B and F) Yue/Clayton (ThetaYC) measurements of  $\beta$ -diversity dissimilarity of fecal microbiota from mice treated as in (A) and (D), respectively. (C and G) Relative abundance of dominant bacterial families in fecal microbiota of mice treated as in (A) and (D), respectively. (E) Pathogen loads in feces of mice treated as in (D) and inoculated with  $10^5$  cfu of *C. rodentium*. Representative results of two independent experiments with n= 4 (B) or n= 9-10 (F) per group are shown. Error bars indicate min to max (B and F) or SD (E) values. Each bar represents an individual mouse (C and G). \*, p<0.05; \*\*, p<0.01; \*\*\*, 0.001; ns, not significant by Kruskal-Wallis test (B and F) or unpaired two-tailed T- test (E).

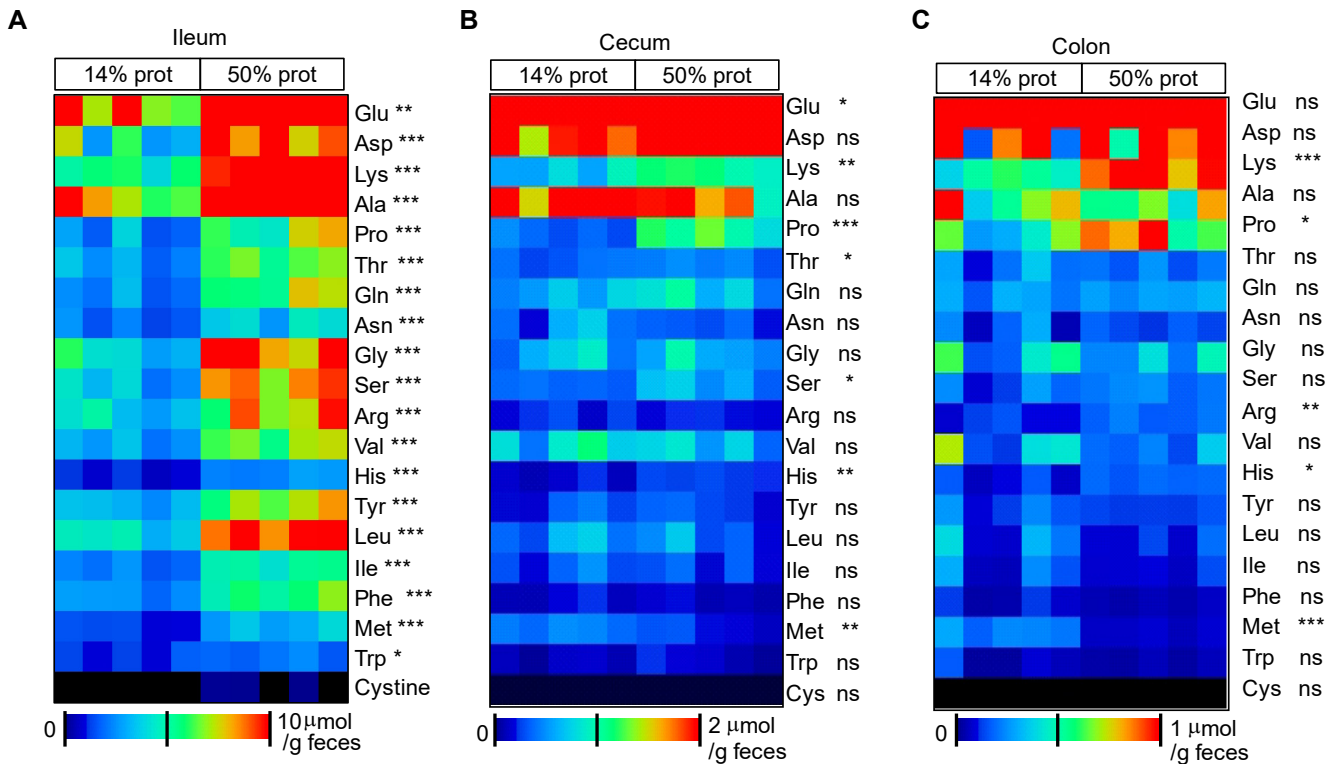

**Figure. S4. Short exposure to high protein diet increases AA levels primarily in the small intestine (related to Figure 4).** (A-C) Heat-map showing luminal AA concentrations in the small intestine cecum and colon of SPF mice fed with 14% or 50% protein diet for two days. Amino acid levels were determined by CE-TOFMS. Representative results of two independent experiments with n= 5 per group are shown. Each column represents one mouse. \*, p<0.05; \*\*, p<0.01; \*\*\*, p<0.001; ns, not significant by unpaired two-tailed T- test comparing 14% vs 50% treatments. Scales are shown below each panel.

**Table S2. Primers used in this study (related to Figures 1 to 3)**

| Name          | Sequence 5'-3'                                                           | Use                        | Reference                    |
|---------------|--------------------------------------------------------------------------|----------------------------|------------------------------|
| BioSamA       | Bio-TEG-CAAGCAGAAGACGGCATAACGAAGACC                                      | Tn-Seq library preparation | Goodman <i>et al.</i> , 2011 |
| M12_top       | CTGTCCGTTCCGACTACCCTCCCGAC                                               |                            |                              |
| M12_bot       | GTCGGGAGGGTAGTCGGAACGGACAG                                               |                            |                              |
| LIB_PCR_5     | CAAGCAGAAGACGGCATAACGAAGACCGGGGACTTATC<br>ATCCAACCTGT                    |                            |                              |
| LIB_PCR_3     | AATGATACGGCGACCACCGAACACTCTTTCCTACACG<br>ACGCTCTTCCGATCT                 |                            |                              |
| LIB_AdaptT_DD | TTCCCTACACGACGCTCTTCCGATCTAACCNN                                         | Input barcodings           | Goodman <i>et al.</i> , 2011 |
| LIB_AdaptB_DD | GGTTAGATCGGAAGAGCGTCGTGTAGGGAA                                           |                            |                              |
| LIB_AdaptT_EE | TTCCCTACACGACGCTCTTCCGATCTTTGGNN                                         |                            |                              |
| LIB_AdaptT_EE | CCAAAGATCGGAAGAGCGTCGTGTAGGGAA                                           |                            |                              |
| LIB_AdaptT_O  | TTCCCTACACGACGCTCTTCCGATCTGCTANN                                         | SPF barcodings             | Goodman <i>et al.</i> , 2011 |
| LIB_AdaptB_O  | TAGCAGATCGGAAGAGCGTCGTGTAGGGAA                                           |                            |                              |
| LIB_AdaptT_P  | TTCCCTACACGACGCTCTTCCGATCTGGAANN                                         |                            |                              |
| LIB_AdaptB_P  | TTCCAGATCGGAAGAGCGTCGTGTAGGGAA                                           |                            |                              |
| LIB_AdaptT_Q  | TTCCCTACACGACGCTCTTCCGATCTGGGGNN                                         |                            |                              |
| LIB_AdaptB_Q  | CCCCAGATCGGAAGAGCGTCGTGTAGGGAA                                           |                            |                              |
| LIB_AdaptT_R  | TTCCCTACACGACGCTCTTCCGATCTGTACNN                                         |                            |                              |
| LIB_AdaptB_R  | GTACAGATCGGAAGAGCGTCGTGTAGGGAA                                           |                            |                              |
| LIB_AdaptT_A  | TTCCCTACACGACGCTCTTCCGATCTTTTTNN                                         |                            |                              |
| LIB_AdaptB_A  | AAAAGATCGGAAGAGCGTCGTGTAGGGAA                                            |                            |                              |
| LIB_AdaptT_B  | TTCCCTACACGACGCTCTTCCGATCTACCANN                                         | SPF barcodings             | Goodman <i>et al.</i> , 2011 |
| LIB_AdaptB_B  | TGGTAGATCGGAAGAGCGTCGTGTAGGGAA                                           |                            |                              |
| LIB_AdaptT_C  | TTCCCTACACGACGCTCTTCCGATCTACGTNN                                         |                            |                              |
| LIB_AdaptB_C  | ACGTAGATCGGAAGAGCGTCGTGTAGGGAA                                           |                            |                              |
| LIB_AdaptT_D  | TTCCCTACACGACGCTCTTCCGATCTAGGANN                                         |                            |                              |
| LIB_AdaptB_D  | TCCTAGATCGGAAGAGCGTCGTGTAGGGAA                                           |                            |                              |
| LIB_AdaptT_V  | TTCCCTACACGACGCTCTTCCGATCTTCAGNN                                         |                            |                              |
| LIB_AdaptB_V  | CTGAAGATCGGAAGAGCGTCGTGTAGGGAA                                           |                            |                              |
| LIB_AdaptT_W  | TTCCCTACACGACGCTCTTCCGATCTTCGANN                                         |                            |                              |
| LIB_AdaptB_W  | TCGAAGATCGGAAGAGCGTCGTGTAGGGAA                                           |                            |                              |
| LIB_AdaptT_Y  | TTCCCTACACGACGCTCTTCCGATCTTTAANN                                         |                            |                              |
| LIB_AdaptB_Y  | TTAAAGATCGGAAGAGCGTCGTGTAGGGAA                                           |                            |                              |
| LIB_AdaptT_Z  | TTCCCTACACGACGCTCTTCCGATCTAAAANN                                         |                            |                              |
| LIB_AdaptB_Z  | TTTTAGATCGGAAGAGCGTCGTGTAGGGAA                                           |                            |                              |
| D-Arg-Fw      | GTCTACCAAGCAGGGTTTTATTTATGACGACGATTCTCA<br>AGCATCTTCATATGAATATCCTCCTTAG  | Deletion of <i>argG</i>    | This paper                   |
| D-Arg-Rv      | CGCCATCAGGCTTCGCTTGTATCGTACTTCGCTTTGTTTT<br>CCAGATTTGTAGGCTGGAGCTGCTTCG  |                            |                              |
| D-ThrC-Fw     | GGCGCACGAGTACTGGGATAATTAATGAAACTCTACAATC<br>TTAAAGATCATATGAATATCCTCCTTAG | Deletion of <i>thrC</i>    | This paper                   |
| D-ThrC-Rv     | CAGCGCCATCAGGCAGTCAGGCGCTTATCTCCGGCTCAT<br>CATCAACTTTGTAGGCTGGAGCTGCTTCG |                            |                              |

|           |                                                                                        |                                         |            |
|-----------|----------------------------------------------------------------------------------------|-----------------------------------------|------------|
| D-HisI-Fw | <b>AATGCAGGGCGTGGAGATCAGGATATGTAAACAGAGCAAC</b><br><b>AGCGCCGCCATATGAATATCCTCCTTAG</b> | Deletion of<br><i>hisI</i>              | This paper |
| D-HisI-Rv | <b>GCCCGGTTTTTTACGCCCGAAGCTTACTGATGACGTCTAC</b><br><b>GCAGGTTTGTAGGCTGGAGCTGCTTCG</b>  |                                         |            |
| D-TrpA-Fw | <b>TCTGAAAGCGCGAGGGGAAATCTGATGGAACGCTACGAAA</b><br><b>CGCTGTTTCATATGAATATCCTCCTTAG</b> | Deletion of<br><i>trpA</i>              | This paper |
| D-TrpA-Rv | <b>AGCGTGTCTGGCGGTCTGTGGGCGCTAACGACGGGTGGC</b><br><b>GGCTTTCATTGTAGGCTGGAGCTGCTTCG</b> |                                         |            |
| D-IlvA-Fw | <b>TAAATCGAAACTGGGAGGCTGATGATGGCCGAATCGCAAC</b><br><b>CTCTGTCACATATGAATATCCTCCTTAG</b> | Deletion of<br><i>ilvA</i>              | This paper |
| D-IlvA-Rv | <b>GCCTTATCCGGCCTACAGTCGTGATCAGGCGCTTTTCTGA</b><br><b>AAGTCTGTGTAGGCTGGAGCTGCTTCG</b>  |                                         |            |
| qArgG-Fw  | <b>GAATACGGTATCGGATAATC</b>                                                            | qRT-PCR<br>of <i>argG</i>               | This paper |
| qArgG-Rv  | <b>GGTCAACAAACCAGACC</b>                                                               |                                         |            |
| qHisA-Fw  | <b>GGATGTGCGTATTGATGAGAAC</b>                                                          | qRT-PCR<br>of <i>hisA</i>               | This paper |
| qHisA-Rv  | <b>ACCAACTGGAAGATAGGTGGCA</b>                                                          |                                         |            |
| qIlvA-Fw  | <b>ACCCGTCTTAATGAACTG</b>                                                              | qRT-PCR<br>of <i>ilvA</i>               | This paper |
| qIlvA-Rv  | <b>CGCTTTTCTGAAAGTCCTG</b>                                                             |                                         |            |
| qTrpC-Fw  | <b>AGACATTTGCGACAAAGTCAC</b>                                                           | qRT-PCR<br>of <i>trpC</i>               | This paper |
| qTrpC-Rv  | <b>ATCCACGAACTGGTAATCACG</b>                                                           |                                         |            |
| qKan-Fw4  | <b>TTCTGGATTCATCGACTGTGG</b>                                                           | qRT-PCR of<br>Kan <sup>R</sup> cassette | This paper |
| qKan-Rv4  | <b>GATACCGTAAAGCACGAGGAAG</b>                                                          |                                         |            |

**Bold**, unique barcodes; *Italicized*, homologous sequences to target gene.

**Table S3. Diets used in this study (related to Figure 4)**

| <b>Diet</b>                                               | <b>Nutrient</b> | <b>% by weight</b> | <b>% kcal from</b> |
|-----------------------------------------------------------|-----------------|--------------------|--------------------|
| Regular chow <sup>a</sup><br>(5LOD)                       | Protein         | 23                 | 26.5               |
|                                                           | Carbohydrate    | 48.5               | 58                 |
|                                                           | Fat             | 5                  | 13.5               |
| 14% protein <sup>b</sup><br>(TD. 00168)                   | Protein         | 14                 | 15.5               |
|                                                           | Carbohydrate    | 66.5               | 71.5               |
|                                                           | Fat             | 5.5                | 13                 |
| 50% protein <sup>b</sup><br>(TD. 94266)                   | Protein         | 50                 | 53.5               |
|                                                           | Carbohydrate    | 31.5               | 33.5               |
|                                                           | Fat             | 5.5                | 13                 |
| 14% protein, 32% carbohydrate <sup>b</sup><br>(TD.190300) | Protein         | 14                 | 15.5               |
|                                                           | Carbohydrate    | 31.5               | 34                 |
|                                                           | Fat             | 21                 | 51                 |

<sup>a</sup> Complex carbohydrate-based standard rodent diet. <sup>b</sup> Simple sugar-based special diets.
